# Supplementary material for: rRNA synthesis inhibitor, CX-5461, activates ATM/ATR pathway in acute lymphoblastic leukemia, arrests cells in G2 phase and induces apoptosis
Source: PubMed Central journal article supplement (PMC4627237; doi:10.18632/oncotarget.4093), 2015-06-05
Supplement: oncotarget-06-18094-s001.pdf [file oncotarget-06-18094-s001.pdf]

## SUPPLEMENTARY FIGURES AND TABLES

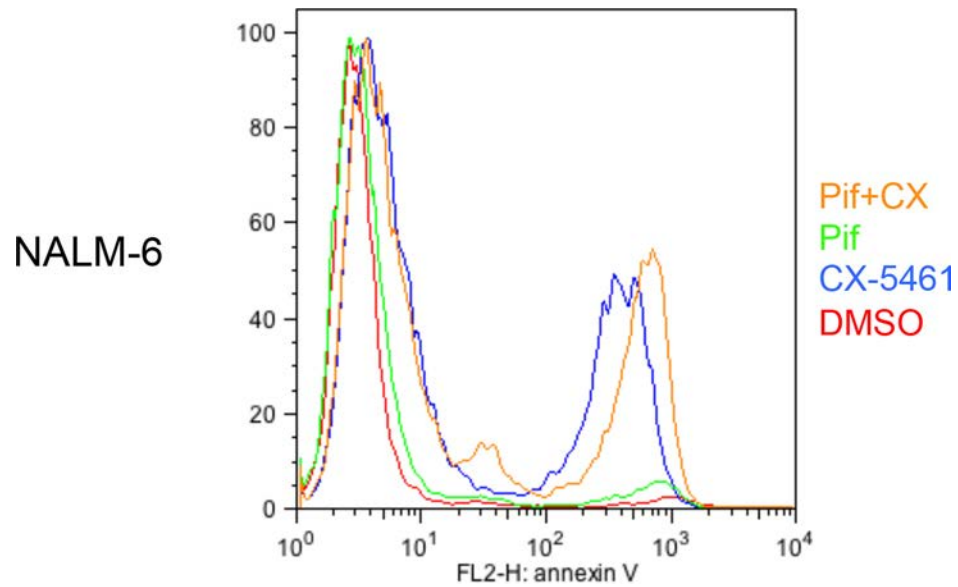

**Supplementary Figure S1: p53 wild type NALM-6 cells were treated with 0.25  $\mu$ M CX-5461 or 30  $\mu$ M Pifithrin- $\alpha$  or both. Annexin V was used to measure apoptosis after 2 days. One representative experiment out of two is shown.**

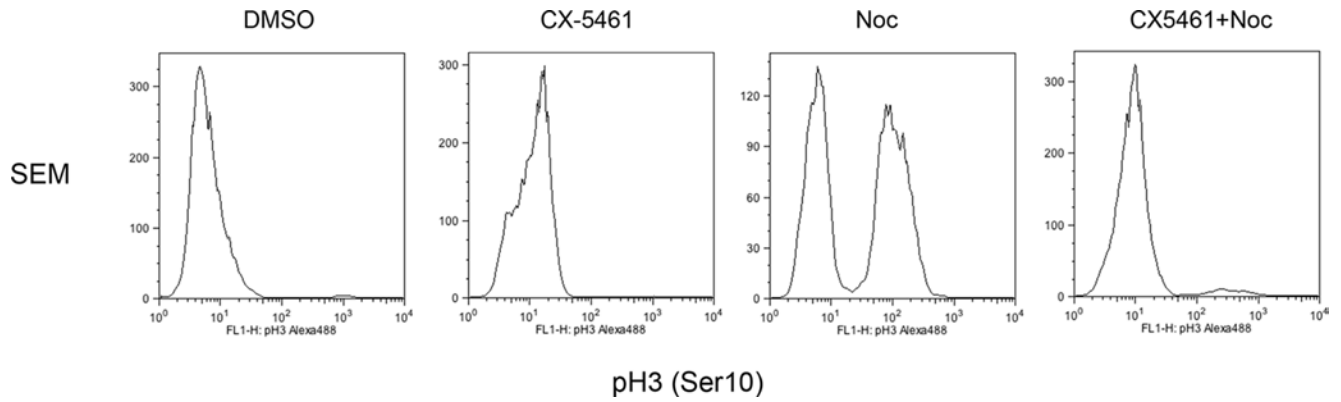

**Supplementary Figure S2: SEM cells were treated with CX-5461, Nocodazole or 2 h pre-treatment with CX-5461 followed by nocodazole. Mitosis specific pH3(S10) antibody was used for flow cytometry.**

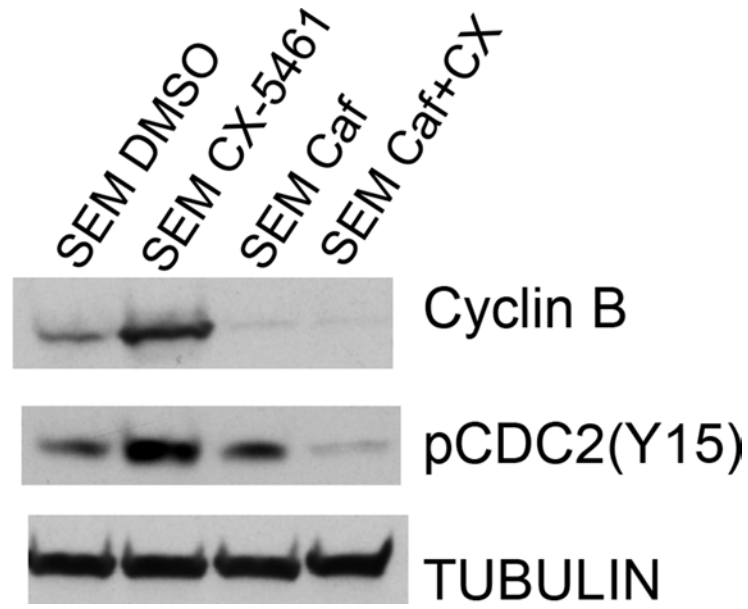

Supplementary Figure S3: Western blot was used to measure the levels of cyclin B, pCDC2(Y15) and tubulin in SEM cells treated with 0.25  $\mu$ M CX-5461 for 1 day.

**Supplementary Table 1. Cell Line**

| Cell Line | Translocation                 | p53 status if known |
|-----------|-------------------------------|---------------------|
| HB11;19   | MLL-ENL                       |                     |
| REH       | TEL-AML1                      | Mut                 |
| RS4;11    | MLL-AF4                       | WT                  |
| SEM       | MLL-AF4                       | Mut                 |
| KOPN-8    | 8 MLL-ENL                     | Mut                 |
| NALM-6    | t(5;12)(q33.2;p13.2)          | WT                  |
| 697       | t(1;19)(q23;p13), del(6)(q21) | WT                  |
| MUTZ-5    | t(12;13)(p12;q13-14)          |                     |

**Supplementary Table 2. Patient Samples**

| Patient Sample | Cytogenetics     |
|----------------|------------------|
| P1             | TEL-AML          |
| P2             | MLL-AF4          |
| P3             | Normal Karyotype |
| P4             | MLL-ENL          |
| P5             | TEL-AML          |
| P6             | MLL-ENL          |
